# Supplementary material
Source: publisher figshare collection journal article supplement (https://sage.figshare.com/ndownloader/files/16924352)
Supplement: Supplementary file 1 [file 16924352]

**Appendix 1: : Table A. 14- week Lesson Plan**

| <b>Weeks</b>               | <b>Content</b>                                                | <b>In-class Activities</b>                                                                                                                                                                                                                                                                         | <b>Out-of-class Activities</b>                                                                                                                                                                                                                                                   |
|----------------------------|---------------------------------------------------------------|----------------------------------------------------------------------------------------------------------------------------------------------------------------------------------------------------------------------------------------------------------------------------------------------------|----------------------------------------------------------------------------------------------------------------------------------------------------------------------------------------------------------------------------------------------------------------------------------|
| <b>Week 1</b>              | Introduction of semester content and activities               | Registering to social networking sites with educational purpose<br><br>Downloading Edmodo mobile application and logging on<br><br>Introduction of some of the media features                                                                                                                      | All features of Edmodo media were lectured ,review of the directive provided in presentation and pdf                                                                                                                                                                             |
| <b>Week 2-<br/>Week 3</b>  | Basic concepts of information technologies                    | Sharing lesson's presentation in online media<br><br>Getting the research subject which was given during the lesson through online media and making research in internet<br><br>Reporting the research result and sharing it with lecturer of the lesson and friends through online learning media | Before and after the lesson reviewing online presentation and e-book on new technologies and concepts of information technologies<br><br>Participating in the discussions started by the lecturers in Edmodo                                                                     |
| <b>Week 4-<br/>Week 6</b>  | Introduction of word processor program and its applications 1 | Writing an appeal<br>Preparing resume<br>Preparing invitation etc.                                                                                                                                                                                                                                 | Review of word processor program, its e-book and work sheets<br><br>Review of the related week's work sheet which is provided in online media<br><br>Fulfilling the tasks given at the work sheets prepared related to the word processor program and sending it to the lecturer |
| <b>MID-TERM EXAM BREAK</b> |                                                               |                                                                                                                                                                                                                                                                                                    |                                                                                                                                                                                                                                                                                  |

|                           |                                                                                                 |                                                                                                                   |                                                                                                                                                                                                                                                                                                                                                  |
|---------------------------|-------------------------------------------------------------------------------------------------|-------------------------------------------------------------------------------------------------------------------|--------------------------------------------------------------------------------------------------------------------------------------------------------------------------------------------------------------------------------------------------------------------------------------------------------------------------------------------------|
| <b>Week 7-<br/>Week 9</b> | Introduction of presentation program and its applications                                       | presentation preparation principles<br><br>Applications in which presentation is prepared by presentation program | Review of presentation program e-book, presentation of presentation preparation principles, samples of well/poor organized presentation and work sheets<br><br>Preparing weekly report of weekly research homework on information technologies field and presenting this via presentation program and sending it to the lecturer in online media |
| <b>Week 10-Week 12</b>    | Introduction of calculation processor program and its applications                              | Creating data tables by calculation processor program and applications of formula/function/graphic etc.           | Review of calculation processor program's e-book, MS excel samples and work sheets                                                                                                                                                                                                                                                               |
| <b>Week 13-14</b>         | Creating survey by Google Documents and get this survey filled in by sharing it in online media | Creating data base by Google Tables and transferring it to MS Excel                                               | Reporting of mini-reseaches created by word processor program and its printing application                                                                                                                                                                                                                                                       |

---

### FINAL EXAM

---

## **Appendix 2: Resources Used to the Nomological Network**

- Ajzen I, Fishbein M. (1980). Understanding Attitudes and Predicting Social Behavior. Englewood Cliffs, NJ: *Prentice-Hall*
- Ajzen, I. (1991). The theory of planned behavior. *Organizational Behavior and Human Decision Processes*, 50(2), 179–211.
- Andreassen, C. S., Torsheim, T., & Pallesen, S. (2014). Predictors of use of social network sites at work-a specific type of cyberloafing. *Journal of Computer-Mediated Communication*, 19(4), 906-921.
- Askew, K. L. (2012). The relationship between cyberloafing and task performance and an examination of the theory of planned behavior as a model of cyberloafing. Graduate Theses and Dissertations, University of South Florida.
- Askew, K., Buckner, J. E., Taing, M. U., Ilie, A., Bauer, J. A., & Coover, M. D. (2014). Explaining cyberloafing: The role of the theory of planned behavior. *Computers in Human Behavior*, 36, 510-519.
- Ataş, M. (2017). *The relationship between teachers'cyberloafing behaviors and time management*. Unpublished Master Thesis. Kahramanmaraş Sütçü İmam University, Kahramanmaraş.
- Baturay, M. H., & Toker, S. (2015). An investigation of the impact of demographics on cyberloafing from an educational setting angle. *Computers in Human Behavior*, 50, 358-366.
- Blanchard, A. L., & Henle, C. A. (2008). Correlates of different forms of cyberloafing: The role of norms and external locus of control. *Computers in Human Behavior*, 24(3), 1067-1084.
- Brubaker, A. T. (2006). Faculty perceptions of the impact of student laptop use in a wireless internet environment on the classroom learning environment and teaching. Unpublished MS thesis, School of Information and Library Science, University of North Carolina, Chapel Hill, NC.
- Çavuşoğlu, S., Palamutçuoğlu, A., & Palamutçuoğlu, B. T. (2014). Çalışanların Demografik Özelliklerinin Sanal Kaytarma (Cyberloafing) Üzerindeki Etkisi: Üniversite Çalışanları Üzerinde Ampirik Bir Araştırma. *Research Journal of Business and Management*, 1(3).
- Cheung, W., Chang, M.K. & Lai, V.S. (2000). Prediction of internet and world wide web usage at work: a test of an extended Triandis model. *Decision Support Systems*, 30(1), 83-100.
- Cihan, A. (2018). A research on the relationship between cyberloafing and perceived professional ethics. Unpublished Master Thesis. Aksaray University, Aksaray.
- Çok, R. (2018). An investigation of predictive conditions various academic variables on the university students' cyber slacking behaviors. Unpublished Master Thesis, Inonu University, Malatya.

- Dursun, O. O., Donmez, O., & Akbulut, Y. (2018). Predictors of Cyberloafing among Preservice Information Technology Teachers. *Contemporary Educational Technology*, 9(1), 22-41.
- Dursun, O. O., Donmez, O., & Akbulut, Y. (2018). Predictors of Cyberloafing among Preservice Information Technology Teachers. *Contemporary Educational Technology*, 9(1), 22-41.
- Ergün, E., & Altun, A. (2012). Öğrenci Gözüyle Siber Aylaklık ve Nedenleri [The Student's Perspective of Cyberloafing and Its Causes], *Eğitim Teknolojisi: Kuram ve Uygulama*, 2 (1), 36-53
- Garrett, R. K., & Danziger, J. N. (2008). On cyberslacking: Workplace status and personal Internet use at work. *CyberPsychology & Behavior*, 11(3), 287-292.
- Gökçearslan, Ş., Mumcu, F. K., Haşlaman, T., & Çevik, Y. D. (2016). Modelling smartphone addiction: The role of smartphone usage, self-regulation, general self-efficacy and cyberloafing in university students. *Computers in Human Behavior*, 63, 639–649.
- Gülduran, Ç. A. (2018). *The effect of big five personality traits on cyberloafing and job performance: A research in hotel managements*. Unpublished Master Thesis. Nevşehir Hacı Bektaş Veli University, Nevşehir.
- Hayit, T., & Donmez, O. (2016). Investigation of the relationship between cyber-loafing profiles and cognitive absorption of university students. *Journal of Research in Education and Teaching*, 5(16), 146-150.
- Henle, C. A., Kohut, G., & Booth, R. (2009). Designing electronic use policies to enhance employee perceptions of fairness and to reduce cyberloafing: An empirical test of justice theory. *Computers in Human Behavior*, 25(4), 902-910.
- Huma, Z. E., Hussain, S., Thurasamy, R., & Malik, M. I. (2017). Determinants of cyberloafing: a comparative study of a public and private sector organization. *Internet Research*, 27(1), 97-117.
- Kalaycı, E. (2010). Üniversite Öğrencilerinin Siber Aylaklık Davranışları ile Öz Düzenleme Stratejileri Arasındaki İlişkilerin İncelenmesi [The Investigation of Relationship between Cyberloafing and Self-Regulated Learning Strategies among Undergraduate Students]. Yayınlanmamış Yüksek Lisans Tezi, Hacettepe Üniversitesi, Fen Bilimleri Enstitüsü, Ankara.
- Karaoglan Yılmaz, F. G. , Yılmaz, R., Öztürk, H. T., Sezer, B., & Karademir, T. (2015). Cyberloafing as a barrier to the successful integration of information and communication technologies into teaching and learning environments. *Computers in Human Behavior*, 45, 290-298.
- Kim, K., Triana, M., Chung, K., & Oh, N. (2016). When do employees cyberloaf? An interactionist perspective examining personality, justice, and empowerment. *Human Resource Management*, 55(6), 1041–1058.

- Kim, S. (2012). Does Person-Organization Fit Matter in the Public Sector? Testing the Mediating Effect of Person-Organization Fit in the Relationship between Public Service Motivation and Work Attitudes, *Public Administration Review*, 72(6): 830-840.
- Kim, S. J., & Byrne, S. (2011). Conceptualizing personal web usage in work contexts: A preliminary framework. *Computers in Human Behavior*, 27(6), 2271-2283.
- Kurt, M. (2011, September). Siber aylaklık davranışlarının karşılaştırmalı olarak incelenmesi. In *Firat University 5th International Computer & Instructional Technologies Symposium, September* (pp. 22-24).
- Lavoie, J. A., & Pychyl, T. A. (2001). Cyberslacking and the procrastination superhighway: A web-based survey of online procrastination, attitudes, and emotion. *Social Science Computer Review*, 19(4), 431-444.
- Liberman, B., Seidman, G., McKenna, K. Y., & Buffardi, L. E. (2011). Employee job attitudes and organizational characteristics as predictors of cyberloafing. *Computers in Human behavior*, 27(6), 2192-2199.
- Liberman, B., Seidman, G., McKenna, K. Y., & Buffardi, L. E. (2011). Employee job attitudes and organizational characteristics as predictors of cyberloafing. *Computers in Human behavior*, 27(6), 2192-2199.
- Lim, V. K., & Chen, D. J. (2012). Cyberloafing at the workplace: gain or drain on work?. *Behaviour & Information Technology*, 31(4), 343-353.
- Mahatanankoon, P., Wen, H. J., & Lim, B. B. (2006). Evaluating the technological characteristics and trust affecting mobile device usage. *International Journal of Mobile Communications*, 4(6), 662-681.
- Moody, G. D., & Siponen, M. (2013). Using the theory of interpersonal behavior to explain non-work-related personal use of the Internet at work. *Information & Management*, 50(6), 322-335.
- O'Neill, T. A., Hambley, L. A., & Bercovich, A. (2014). Prediction of cyberslacking when employees are working away from the office. *Computers in Human Behavior*, 34, 291-298.
- Prasad S., Lim V.K. & Chen D.J. (2010). *Self-regulation, Individual Characteristics and Cyberloafing*. [Paper presented at PACIS, Singapore]. Retrieved from <http://aisel.aisnet.org/pacis2010/159/> on 4 April 2015.
- Şimşek, D. (2018). *In search for arousal procrastination: active procrastination and its relations with sensation seeking, need for cognition and cyberslacking*. Unpublished Master Thesis. Bahçeşehir University, İstanbul.
- Skeja, A. (2019). *The Role of Stress on the Relation Between Cyberloafing and Creativity: The Case of Kosova*. Unpublished PhD Thesis, Trakya University, Edirne.
- Tanrıverdi, Ö. (2017). *The investigation of the relationships between cognitive absorption levels and cyberloafing activities among adolescents*. Unpublished Master Thesis. Marmara University, İstanbul.

- Triandis, H. C. (1977). *Interpersonal behavior*. Brooks/Cole Pub. Co.
- Ugrin, J. C., & Pearson, J. M. (2013). The effects of sanctions and stigmas on cyberloafing. *Computers in Human Behavior*, 29(3), 812-820.
- Ugrin, J. C., Pearson, J. M., & Odom, M. D. (2008). Profiling cyber-slackers in the workplace: Demographic, cultural, and workplace factors. *Journal of Internet Commerce*, 6(3), 75-89.
- Vitak, J., Crouse, J., & LaRose, R. (2011). Personal Internet use at work: Understanding cyberslacking. *Computers in Human Behavior*, 27(5), 1751-1759.
- Woods, F. (2014). A Study into the Relationship between Cyberloafing, Procrastination and Conscientiousness in the Workplace. Department of Psychology, DBS School of Arts, Dublin.
- Yaşar, S. (2013). The effects of students' locus of control and attitudes towards computer laboratory on their cyberloafing behaviour. Master Thesis, *Hacettepe University, Ankara*.
- Yaşar, S., & Yurdugül, H. (2013). The investigation of relation between cyberloafing activities and cyberloafing behaviors in higher education. *Procedia-Social and Behavioral Sciences*, 83, 600–604.
- Yildiz Durak, H. & Sarıtepeci, M. (2019). Occupational Burnout and Cyberloafing Among Teachers: Analysis of Personality Traits, Individual and Occupational Status Variables As Predictors. *The Social Science Journal*, 56(1), 69-87. doi: <https://doi.org/10.1016/j.soscij.2018.10.011>
- Yılmaz, R., & Yurdugül, H. (2018). Cyberloafing in IT classrooms: exploring the role of the psycho-social environment in the classroom, attitude to computers and computing courses, motivation and learning strategies. *Journal of Computing in Higher Education*, 30(3), 530-552.
